# Supplementary material for: Diversity and distribution of fungal communities in the marine sediments of Kongsfjorden, Svalbard (High Arctic)
Source: PubMed Central journal article supplement (PMC4615975; doi:10.1038/srep14524), 2015-10-23
Supplement: srep14524-s1.pdf [file srep14524-s1.pdf]

## Supplementary Material

### **Diversity and distribution of fungal communities in the marine sediments of Kongsfjorden, Svalbard (High Arctic)**

Tao Zhang<sup>1</sup>, Neng Fei Wang<sup>2</sup>, Yu-Qin Zhang<sup>1</sup>, Hong-Yu Liu<sup>1</sup> & Li-Yan Yu<sup>1\*</sup>

1. China Pharmaceutical Culture Collection, Institute of Medicinal Biotechnology, Chinese Academy of Medical Sciences & Peking Union Medical College, Beijing 100050, PR China

2. Key Lab of Marine Bioactive Substances, First Institute of Oceanography, State Oceanic Administration, Qingdao 266061, PR China

\* Corresponding Author E-mail: [yly@cpcc.ac.cn](mailto:yly@cpcc.ac.cn); Tel/fax:+86 10 63187118

**Table S1.** Information on the OTUs found in the 8 sediment samples, including their frequency, number of reads and BLASTn top hits with accession numbers in GenBank.

| OTU ID | Freq. | Reads | phylum        | Order             | Family             | Indendification               | Close GenBank match / Accession             | Similarity    | Originally reported habitat               |
|--------|-------|-------|---------------|-------------------|--------------------|-------------------------------|---------------------------------------------|---------------|-------------------------------------------|
| 1      | 7     | 17046 | Ascomycota    | Hypocreales       | Nectriaceae        | <i>Fusarium redolens*</i>     | Uncultured fungus clone FN397215            | 550/553(99%)  | Soil in France                            |
|        |       |       |               |                   |                    |                               | <i>Fusarium redolens</i> KC989062           | 546/553(99%)  | Roots in Sweden                           |
| 2      | 1     | 24    | Basidiomycota | Trechisporales    | Unassigned         | Trechisporales                | Uncultured Trechisporales clone JF691126    | 324/356(91%)  | Plant roots in Reunioin                   |
| 3      | 1     | 3     | Ascomycota    | Chaetosphaeriales | Chaetosphaeriaceae | <i>Chloridium**</i>           | Uncultured <i>Chloridium</i> clone JX545202 | 224/225(99%)  | Soil in USA                               |
| 4      | 8     | 5695  | Ascomycota    | Hypocreales       | Nectriaceae        | <i>Fusarium proliferatum*</i> | <i>Fusarium proliferatum</i> FN868470       | 392/402(98%)  | Spanish stands of <i>Pinus halepensis</i> |
| 5      | 3     | 7     | Ascomycota    | Eurotiales        | Aspergillaceae     | <i>Aspergillus oryzae*</i>    | <i>Aspergillus oryzae</i> EU301638          | 270/271(99%)  | Forest soilin China                       |
| 6      | 1     | 5     | Glomeromycota | Unassigned        | Unassigned         | Glomeromycota                 | Uncultured Glomeromycota clone KF939961     | 270/295(92%)  | Plant root in Tibet                       |
| 7      | 1     | 2     | Unassigned    | Unassigned        | Unassigned         | Fungus                        | Uncultured fungus clone KF800416            | 305/369(83%)  | Soil                                      |
| 8      | 6     | 80    | Ascomycota    | Hypocreales       | Nectriaceae        | <i>Fusarium**</i>             | Uncultured <i>Fusarium</i> clone GQ280339   | 240/245(98%)  | Plant roots                               |
| 9      | 1     | 3     | Ascomycota    | Saccharomycetales | Metschnikowiaceae  | Metschnikowiaceae             | <i>Metschnikowia cibodasensis</i> AB236922  | 357/390(92%)  | Plant flowers in Indonesia                |
| 10     | 7     | 95    | Ascomycota    | Pleosporales      | Pleosporaceae      | <i>Alternaria alternata*</i>  | <i>Alternaria alternata</i> FJ872066        | 521/521(100%) | Plant roots of <i>Pinus mugo</i>          |
| 11     | 2     | 18    | Basidiomycota | Malasseziales     | Malasseziaceae     | <i>Malassezia**</i>           | Uncultured eukaryote clone GU941443         | 485/486(99%)  | South China Sea                           |
|        |       |       |               |                   |                    |                               | Uncultured <i>Malassezia</i> clone KC785585 | 486/491(99%)  | Soil in Antarctica                        |
| 12     | 1     | 2     | Ascomycota    | Unassigned        | Unassigned         | Ascomycota                    | Uncultured fungus clone JX043002            | 345/368(94%)  | Ectomycorrhiza in USA                     |
|        |       |       |               |                   |                    |                               | Uncultured Ascomycota clone EU490097        | 339/393(86%)  | Savanna soil                              |
| 13     | 1     | 3     | Unassigned    | Unassigned        | Unassigned         | Fungus                        | Uncultured soil fungus clone JX489834       | 299/374(80%)  | Soil in China                             |
| 14     | 5     | 39    | Ascomycota    | Hypocreales       | Nectriaceae        | <i>Fusarium**</i>             | Uncultured <i>Fusarium</i> clone GQ280339   | 427/434(98%)  | Plant roots                               |
| 15     | 2     | 37    | Ascomycota    | Helotiales        | Unassigned         | <i>Gloeotinia temulenta*</i>  | Uncultured eukaryote clone KJ182739         | 533/534(99%)  | Surface sea water                         |
|        |       |       |               |                   |                    |                               | <i>Gloeotinia temulenta</i> DQ235697        | 532/534(99%)  | Plant seed                                |
| 16     | 1     | 3     | Ascomycota    | Hypocreales       | Clavicipitaceae    | <i>Paecilomyces carneus*</i>  | <i>Paecilomyces</i> sp. GQ241283            | 243/249(98%)  | Wastes                                    |
|        |       |       |               |                   |                    |                               | <i>Paecilomyces carneus</i> EU553292        | 214/219(98%)  | Unreported                                |
| 17     | 1     | 6     | Basidiomycota | Sebacinales       | Unassigned         | Sebacinales                   | Uncultured Sebacinales clone FN663669       | 404/411(98%)  | Plant roots                               |
| 18     | 1     | 16    | Basidiomycota | Sebacinales       | Unassigned         | Sebacinales                   | Uncultured Sebacinales clone FJ475786       | 366/392(93%)  | Forest soil in Sweden                     |

| OTU ID | Freq. | Reads | phylum        | Order               | Family               | Indendification                       | Close GenBank match / Accession              | Similarity    | Originally reported habitat                              |
|--------|-------|-------|---------------|---------------------|----------------------|---------------------------------------|----------------------------------------------|---------------|----------------------------------------------------------|
| 19     | 1     | 8     | Basidiomycota | Unassigned          | Unassigned           | Basidiomycota                         | Uncultured Basidiomycota clone HM240234      | 463/492(94%)  | Grassland soil in USA                                    |
| 20     | 1     | 3     | Ascomycota    | Unassigned          | Unassigned           | Dothideomycetes                       | Uncultured soil fungus clone EU490120        | 471/504(93%)  | Savanna soil                                             |
|        |       |       |               |                     |                      |                                       | Dothideomycetes sp. AB847071                 | 418/448(93%)  | Plant roots in Japan                                     |
| 21     | 2     | 7     | Ascomycota    | Hypocreales         | Nectriaceae          | <i>Fusarium solani</i> *              | <i>Fusarium solani</i> KM229706              | 363/374(97%)  | Unreported                                               |
| 22     | 2     | 10    | Ascomycota    | Capnodiales         | Davidiellaceae       | <i>Cladosporium cladosporioides</i> * | <i>Cladosporium</i> sp. HG008746             | 467/468(99%)  | Air sample in France                                     |
|        |       |       |               |                     |                      |                                       | <i>Cladosporium cladosporioides</i> GU566222 | 467/468(99%)  | Rhizosphere in Czech                                     |
| 23     | 3     | 13    | Ascomycota    | Capnodiales         | Davidiellaceae       | <i>Davidiella tassiana</i> *          | <i>Davidiella tassiana</i> GU566225          | 558/559(99%)  | Rhizosphere                                              |
| 24     | 2     | 6     | Basidiomycota | Cystofilobasidiales | Cystofilobasidiaceae | <i>Mrakia blollopis</i> *             | <i>Mrakia blollopis</i> AB916516             | 406/410(99%)  | Arctic bird feather in Norway                            |
| 25     | 4     | 17    | Ascomycota    | Hypocreales         | Nectriaceae          | <i>Fusarium equiseti</i> *            | <i>Fusarium</i> sp. EU330614                 | 544/544(100%) | Mangrove plant in China                                  |
|        |       |       |               |                     |                      |                                       | <i>Fusarium equiseti</i> HQ332532            | 530/530(100%) | Plant                                                    |
| 26     | 4     | 9     | Ascomycota    | Eurotiales          | Aspergillaceae       | <i>Aspergillus tubingensis</i> *      | <i>Aspergillus</i> sp. HM801881              | 455/456(99%)  | Rock phosphate mine landfills                            |
|        |       |       |               |                     |                      |                                       | <i>Aspergillus tubingensis</i> HQ728255      | 449/449(100%) | Tea                                                      |
| 27     | 2     | 12    | Unassigned    | Unassigned          | Unassigned           | Fungus                                | Uncultured fungus clone AM260830             | 377/449(84%)  | Peat in United Kingdom                                   |
| 28     | 1     | 5     | Ascomycota    | Chaetothyriales     | Unassigned           | Chaetothyriales                       | Uncultured Chaetothyriales clone HM136629    | 247/266(93%)  | Rhizosphere soil                                         |
| 29     | 7     | 217   | Ascomycota    | Saccharomycetales   | Phaffomycetaceae     | <i>Pichia pastoris</i> *              | <i>Pichia pastoris</i> FR839630              | 368/379(97%)  | Unassigned                                               |
| 30     | 1     | 2     | Basidiomycota | Sporidiobolales     | Unassigned           | <i>Rhodotorula glutinis</i> *         | <i>Rhodotorula glutinis</i> AB025993         | 508/513(99%)  | Deep sea environments around the northwest Pacific Ocean |
| 31     | 3     | 6     | Ascomycota    | Pleosporales        | Didymellaceae        | <i>Phoma medicaginis</i> *            | <i>Phoma medicaginis</i> KF293988            | 521/521(100%) | Plant stem in China                                      |
| 32     | 1     | 61    | Basidiomycota | Agaricales          | Entolomataceae       | <i>Nolanea conferenda</i> *           | <i>Nolanea</i> sp. JQ272420                  | 451/458(98%)  | USA                                                      |
|        |       |       |               |                     |                      |                                       | <i>Nolanea conferenda</i> AF538624           | 408/413(99%)  | Unreported                                               |
| 33     | 1     | 21    | Ascomycota    | Helotiales          | Helotiaceae          | Helotiaceae                           | Uncultured Helotiaceae clone FJ440900        | 447/494(90%)  | Plant roots                                              |
| 34     | 8     | 3147  | Ascomycota    | Saccharomycetales   | Phaffomycetaceae     | <i>Pichia pastoris</i> *              | <i>Pichia pastoris</i> FR839631              | 384/387(99%)  | Unreported                                               |
| 35     | 1     | 15    | Basidiomycota | Thelephorales       | Thelephoraceae       | Thelephoraceae                        | Thelephoraceae sp. HE814222                  | 279/281(99%)  | Root tips in China                                       |
| 36     | 1     | 3     | Basidiomycota | Sebacinales         | Sebacinaceae         | <i>Sebacina</i> **                    | Uncultured <i>Sebacina</i> clone JQ318631    | 220/222(99%)  | Plant                                                    |

| OTU ID | Freq. | Reads | phylum        | Order             | Family              | Indendification                   | Close GenBank match / Accession                                                       | Similarity                   | Originally reported habitat            |
|--------|-------|-------|---------------|-------------------|---------------------|-----------------------------------|---------------------------------------------------------------------------------------|------------------------------|----------------------------------------|
| 37     | 1     | 4     | Unassigned    | Unassigned        | Unassigned          | Fungus                            | Uncultured fungus clone EF619893                                                      | 395/424(93%)                 | Forest soil in USA                     |
| 38     | 8     | 1645  | Ascomycota    | Saccharomycetales | Phafomycetaceae     | <i>Pichia pastoris</i> *          | <i>Pichia pastoris</i> FN392325                                                       | 393/400(98%)                 | Unreported                             |
| 39     | 5     | 1810  | Unassigned    | Unassigned        | Unassigned          | Fungus                            | Uncultured soil fungus clone EU480016                                                 | 305/386(79%)                 | Rhizosphere soil in USA                |
| 40     | 1     | 64    | Ascomycota    | Helotiales        | Unassigned          | Helotiales                        | Uncultured Helotiales clone FJ827172                                                  | 348/350(99%)                 | Ectomycorrhiza in China                |
| 41     | 3     | 6     | Ascomycota    | Hypocreales       | Nectriaceae         | <i>Fusarium verticillioides</i> * | Uncultured <i>Fusarium</i> clone GQ280339<br><i>Fusarium verticillioides</i> JX915250 | 393/401(98%)<br>391/401(98%) | Plant roots<br>Soils                   |
| 42     | 1     | 5     | Ascomycota    | Helotiales        | Dermateaceae        | Demateaceae                       | Uncultured Demateaceae clone FJ553813                                                 | 510/512(99%)                 | Forest soil in Canada                  |
| 43     | 1     | 82    | Basidiomycota | Atheliales        | Atheliaceae         | <i>Piloderma</i> **               | <i>Piloderma</i> sp. JQ711967                                                         | 489/510(96%)                 | Ectomycorrhiza in Canada               |
| 44     | 1     | 4     | Ascomycota    | Hypocreales       | Unassigned          | <i>Acremonium</i> **              | <i>Acremonium</i> sp. EF577237                                                        | 443/447(99%)                 | Unreported                             |
| 45     | 1     | 6     | Ascomycota    | Chaetothyriales   | Herpotrichiellaceae | Herpotrichiellaceae               | <i>Cladophialophora chaetospora</i> KF359558                                          | 394/440(90%)                 | Plant root                             |
| 46     | 6     | 262   | Ascomycota    | Hypocreales       | Nectriaceae         | <i>Fusarium</i> **                | <i>Fusarium</i> sp. KC748302                                                          | 397/405(98%)                 | Compost                                |
| 47     | 1     | 4     | Basidiomycota | Sebacinales       | Unassigned          | Sebacinales                       | Sebacinales sp. HE814123                                                              | 395/404(98%)                 | Root tips in China                     |
| 48     | 1     | 10    | Basidiomycota | Polyporales       | Polyporaceae        | <i>Trametes polyzona</i> *        | <i>Trametes polyzona</i> JN164980                                                     | 400/410(98%)                 | Unreported                             |
| 49     | 1     | 27    | Ascomycota    | Chaetothyriales   | Herpotrichiellaceae | Herpotrichiellaceae               | <i>Cladophialophora chaetospora</i> KF359558                                          | 482/526(92%)                 | Plant root in USA                      |
| 50     | 1     | 313   | Basidiomycota | Sebacinales       | Sebacinaceae        | <i>Sebacina</i> **                | Uncultured <i>Sebacina</i> mycobiont JQ420983                                         | 463/480(96%)                 | Plant                                  |
| 51     | 2     | 5     | Ascomycota    | Pleosporales      | Pleosporaceae       | <i>Epicoccum</i> **               | <i>Epicoccum</i> sp. JX014389                                                         | 513/514(99%)                 | Plant leaf                             |
| 52     | 4     | 131   | Basidiomycota | Malasseziales     | Malasseziaceae      | <i>Malassezia restricta</i> *     | <i>Malassezia restricta</i> EU400587                                                  | 445/447(99%)                 | Plant                                  |
| 53     | 1     | 3     | Unassigned    | Unassigned        | Unassigned          | Fungus                            | Uncultured fungus clone KF800591                                                      | 397/482(82%)                 | Indoor air in USA                      |
| 54     | 1     | 2     | Basidiomycota | Tremellales       | Unassigned          | <i>Trichosporon porosum</i> *     | <i>Trichosporon porosum</i> KF285994                                                  | 404/405(99%)                 | Netherlands                            |
| 55     | 1     | 5     | Ascomycota    | Helotiales        | Hyaloscyphaceae     | Hyaloscyphaceae                   | Hyaloscyphaceae sp. KF359568                                                          | 357/363(98%)                 | Plant root in USA                      |
| 56     | 1     | 17    | Basidiomycota | Thelephorales     | Thelephoraceae      | Thelephoraceae                    | Uncultured Thelephoraceae clone AB769919                                              | 461/472(98%)                 | Ectomycorrhizal root tip               |
| 57     | 1     | 17    | Ascomycota    | Chaetothyriales   | Herpotrichiellaceae | Herpotrichiellaceae               | <i>Cladophialophora chaetospora</i> EU035405                                          | 383/406(94%)                 | Plant roots                            |
| 58     | 2     | 68    | Ascomycota    | Helotiales        | Unassigned          | Helotiales                        | Uncultured Leotiomyces clone HM230871<br>Uncultured Helotiales clone AB636433         | 504/516(98%)<br>492/516(95%) | Mycorrhiza<br>Ectomycorrhizal root tip |

| OTU ID | Freq. | Reads | phylum        | Order             | Family              | Indendification              | Close GenBank match / Accession               | Similarity    | Originally reported habitat      |
|--------|-------|-------|---------------|-------------------|---------------------|------------------------------|-----------------------------------------------|---------------|----------------------------------|
| 59     | 1     | 16    | Ascomycota    | Unassigned        | Unassigned          | Ascomycota                   | Uncultured fungus clone JX987750              | 374/376(99%)  | Soil in China                    |
|        |       |       |               |                   |                     |                              | <i>Stromatonectria caraganae</i> HQ112288     | 374/406(85%)  | Unreported                       |
| 60     | 1     | 8     | Ascomycota    | Chaetothyriales   | Unassigned          | Chaetothyriales              | Uncultured Chaetothyriales clone KF385366     | 404/427(95%)  | Rhizosphere soil                 |
| 61     | 1     | 38    | Ascomycota    | Unassigned        | Unassigned          | Ascomycota                   | Ascomycota sp. JF273509                       | 469/469(100%) | Ectomycorrhiza                   |
| 62     | 1     | 5     | Ascomycota    | Hypocreales       | Cordycipitaceae     | <i>Engyodontium**</i>        | <i>Engyodontium album</i> HQ115665            | 404/423(96%)  | Wall after water damage          |
| 63     | 1     | 7     | Ascomycota    | Unassigned        | Unassigned          | Ascomycota                   | Uncultured Ascomycota clone JQ991643          | 385/396(97%)  | Ectomycorrhizal root tips        |
| 64     | 1     | 4     | Basidiomycota | Agaricales        | Tricholomataceae    | Tricholomataceae             | Tricholomataceae sp. EF060532                 | 349/349(100%) | Sea water in USA (Hawaii)        |
| 65     | 1     | 15    | Basidiomycota | Sebacinales       | Sebacinaceae        | <i>Sebacina**</i>            | Uncultured <i>Sebacina</i> mycobiont JQ420983 | 421/436(97%)  | Plant                            |
| 66     | 1     | 22    | Zygomycota    | Mortierellales    | Mortierellaceae     | <i>Mortierella humilis*</i>  | <i>Mortierella humilis</i> JF439486           | 394/397(99%)  | Soil                             |
| 67     | 1     | 8     | Ascomycota    | Pezizales         | Pezizaceae          | Pezizaceae                   | Pezizaceae sp. HE814085                       | 316/317(99%)  | Plant roots in China             |
| 68     | 5     | 41    | Ascomycota    | Eurotiales        | Aspergillaceae      | <i>Eurotium amstelodami*</i> | <i>Eurotium</i> sp. KF367488                  | 540/540(100%) | Untreated drinking water sources |
|        |       |       |               |                   |                     |                              | <i>Eurotium amstelodami</i> HQ728257          | 534/541(99%)  | Pu-erh tea                       |
| 69     | 1     | 16    | Ascomycota    | Helotiales        | Hyaloscyphaceae     | Hyaloscyphaceae              | Hyaloscyphaceae sp. JQ272392                  | 375/388(97%)  | Plant root                       |
| 70     | 1     | 5     | Ascomycota    | Hypocreales       | Unassigned          | <i>Acremonium tubakii*</i>   | Uncultured eukaryote clone GU942191           | 523/526(99%)  | South China Sea                  |
|        |       |       |               |                   |                     |                              | <i>Acremonium tubakii</i> KC426993            | 466/467(99%)  | Soil                             |
| 71     | 1     | 2     | Ascomycota    | Chaetothyriales   | Herpotrichiellaceae | <i>Cladophialophora**</i>    | <i>Cladophialophora chaetospira</i> EU035405  | 387/406(95%)  | Soil in Germany                  |
| 72     | 1     | 14    | Ascomycota    | Unassigned        | Unassigned          | Dothideomycetes              | Dothideomycetes sp. JQ759518                  | 447/447(100%) | Plant in USA                     |
| 73     | 1     | 2     | Unassigned    | Unassigned        | Unassigned          | Fungus                       | Uncultured fungus clone JX334538              | 314/386(81%)  | Soi                              |
| 74     | 2     | 109   | Ascomycota    | Helotiales        | Unassigned          | Helotiales                   | Uncultured Helotiales clone JQ991730          | 470/471(99%)  | Ectomycorrhizal root tips        |
| 75     | 1     | 19    | Ascomycota    | Saccharomycetales | Phaffomycetaceae    | <i>Pichia pastoris*</i>      | <i>Pichia pastoris</i> FR839631               | 236/244(97%)  | Unreported                       |
| 76     | 2     | 77    | Unassigned    | Unassigned        | Unassigned          | Fungus                       | Uncultured fungus clone HQ662845              | 435/509(85%)  | Soil in South Korea              |
| 77     | 1     | 5     | Unassigned    | Unassigned        | Unassigned          | Fungus                       | Uncultured fungus clone HQ436041              | 292/295(99%)  | Axonopus compressus soil         |
| 78     | 7     | 156   | Unassigned    | Unassigned        | Unassigned          | Fungus                       | Uncultured fungus clone JX344420              | 296/386(77%)  | Soil                             |
| 79     | 2     | 167   | Ascomycota    | Helotiales        | Helotiaceae         | Helotiaceae                  | Uncultured Leotiomycetes clone HM230895       | 460/510(90%)  | Mycorrhiza                       |

| OTU ID | Freq. | Reads | phylum          | Order              | Family             | Indendification                      | Close GenBank match / Accession                 | Similarity    | Originally reported habitat       |
|--------|-------|-------|-----------------|--------------------|--------------------|--------------------------------------|-------------------------------------------------|---------------|-----------------------------------|
|        |       |       |                 |                    |                    |                                      | Uncultured Helotiaceae clone FJ440900           | 445/494(90%)  | Plant roots in USA                |
| 80     | 1     | 25    | Unassigned      | Unassigned         | Unassigned         | Fungus                               | Uncultured soil fungus clone HM037647           | 421/433(97%)  | Soil in Netherlands               |
| 81     | 1     | 4     | Ascomycota      | Pleosporales       | Venturiaceae       | <i>Venturia</i> **                   | Uncultured <i>Venturia</i> clone FJ553146       | 420/433(97%)  | Forest soil in Canada             |
| 82     | 1     | 78    | Ascomycota      | Helotiales         | Hyaloscyphaceae    | Hyaloscyphaceae                      | Uncultured Hyaloscyphaceae clone JX317338       | 460/467(99%)  | Plant roots                       |
| 83     | 1     | 2     | Ascomycota      | Xylariales         | Amphisphaeriaceae  | <i>Pestalotiopsis vismiae</i> *      | <i>Pestalotiopsis</i> sp. HE608797              | 369/369(100%) | Marine sponge                     |
|        |       |       |                 |                    |                    |                                      | <i>Pestalotiopsis vismiae</i> EF451801          | 366/369(99%)  | Medicinal plant from Brazil       |
| 84     | 1     | 4     | Ascomycota      | Rhytismatales      | Rhytismataceae     | Rhytismataceae                       | Rhytismataceae sp. JQ272405                     | 283/289(98%)  | Plant root in USA                 |
| 85     | 1     | 3     | Basidiomycota   | Agaricales         | Amanitaceae        | <i>Amanita fritillaria</i> *         | <i>Amanita fritillaria</i> JF273505             | 424/425(99%)  | Ectomycorrhiza in China           |
| 86     | 1     | 66    | Ascomycota      | Helotiales         | Unassigned         | Helotiales                           | Uncultured Helotiales clone AB636433            | 465/466(99%)  | Ectomycorrhizal root tip in China |
| 87     | 5     | 277   | Ascomycota      | Hypocreales        | Nectriaceae        | <i>Fusarium solani</i> *             | <i>Fusarium solani</i> JN232143                 | 542/545(99%)  | Unreported                        |
| 88     | 8     | 3005  | Ascomycota      | Saccharomycetales  | Phaffomycetaceae   | <i>Pichia pastoris</i> *             | <i>Pichia pastoris</i> FR839630                 | 389/401(97%)  | Unreported                        |
| 89     | 1     | 4     | Unassigned      | Unassigned         | Unassigned         | Fungus                               | Uncultured fungus clone JX898595                | 346/365(95%)  | Cave and mine                     |
| 90     | 1     | 31    | Chytridiomycota | Rhizophydiales     | Unassigned         | Rhizophydiales                       | <i>Betamyces americaemerdionalis</i> EF585664   | 441/515(86%)  | Unreported                        |
| 91     | 1     | 5     | Unassigned      | Unassigned         | Unassigned         | Fungus                               | Uncultured soil fungus clone JQ666673           | 269/338(80%)  | Forest soil in China (Changbai)   |
| 92     | 1     | 33    | Unassigned      | Unassigned         | Unassigned         | Fungus                               | Uncultured fungus clone FN391362                | 399/494(81%)  | Ground soil in France             |
| 93     | 5     | 138   | Ascomycota      | Hypocreales        | Nectriaceae        | <i>Fusarium</i> **                   | Uncultured <i>Fusarium</i> clone GQ280339       | 379/387(98%)  | Roots                             |
| 94     | 1     | 26    | Basidiomycota   | Boletales          | Boletaceae         | <i>Boletellus obscurococcineus</i> * | <i>Boletellus obscurococcineus</i> AB973723     | 348/350(99%)  | Macro fungi in Japan              |
| 95     | 8     | 3321  | Ascomycota      | Hypocreales        | Nectriaceae        | <i>Fusarium oxysporum</i> *          | <i>Fusarium</i> sp. KF472154                    | 547/547(100%) | Ectomycorrhiza in coastal forest  |
|        |       |       |                 |                    |                    |                                      | <i>Fusarium oxysporum</i> KM005082              | 546/547(99%)  | Plant in Mexico                   |
| 96     | 1     | 59    | Ascomycota      | Helotiales         | Unassigned         | Helotiales                           | Uncultured fungus clone KF007259                | 508/515(99%)  | Root tip in Portugal              |
|        |       |       |                 |                    |                    |                                      | Helotiales sp. HE814129                         | 448/448(100%) | Root tips in China                |
| 97     | 1     | 4     | Basidiomycota   | Tremellales        | Unassigned         | Tremellales                          | Tremellales sp. EF060950                        | 366/377(97%)  | Sea water in USA (Palmyra Atoll)  |
| 98     | 1     | 9     | Ascomycota      | Chaetosphaeriales; | Chaetosphaeriaceae | <i>Chloridium virescens</i> *        | Uncultured <i>Chaetosphaeria</i> clone JX317418 | 519/528(98%)  | Plant roots in Forest             |
|        |       |       |                 |                    |                    |                                      | <i>Chloridium virescens</i> JX684009            | 466/475(98%)  | Decaying wood-saprophyte          |

| OTU ID | Freq. | Reads | phylum          | Order             | Family        | Indendification                     | Close GenBank match / Accession                                             | Similarity                   | Originally reported habitat                             |
|--------|-------|-------|-----------------|-------------------|---------------|-------------------------------------|-----------------------------------------------------------------------------|------------------------------|---------------------------------------------------------|
| 99     | 1     | 7     | Basidiomycota   | Sebacinales       | Unassigned    | Sebacinales                         | Sebacinales sp. KF359622                                                    | 345/355(97%)                 | Plant roots in USA                                      |
| 100    | 1     | 7     | Basidiomycota   | Sporidiobolales   | Unassigned    | <i>Curvibasidium cygneicollum</i> * | Sporidiobolales sp. EF060827<br><i>Curvibasidium cygneicollum</i> AF444525  | 355/367(97%)<br>325/328(99%) | Sea water in USA (Hawaii)<br>Unreported                 |
| 101    | 5     | 452   | Unassigned      | Unassigned        | Unassigned    | Fungus                              | Uncultured soil fungus clone EU480016                                       | 292/371(79%)                 | Semiarid grassland                                      |
| 102    | 2     | 3     | Ascomycota      | Thelebolales      | Thelebolaceae | <i>Thelebolus globosus</i> *        | <i>Thelebolus globosus</i> JX171196                                         | 368/372(99%)                 | Antarctica                                              |
| 103    | 1     | 164   | Ascomycota      | Saccharomycetales | Unassigned    | Saccharomycetales                   | <i>Metschnikowia pulcherrima</i> AY301026                                   | 378/425(89%)                 | Unreported                                              |
| 104    | 2     | 13    | Basidiomycota   | Atheliales        | Altheliaceae  | Atheliaceae                         | Uncultured Atheliaceae clone JQ991648                                       | 467/467(100%)                | Ectomycorrhizal root tips in China                      |
| 105    | 1     | 3     | Ascomycota      | Hypocreales       | Nectriaceae   | <i>Fusarium</i> **                  | Uncultured <i>Fusarium</i> clone KF752620                                   | 232/239(97%)                 | Plant roots in China                                    |
| 106    | 2     | 1357  | Unassigned      | Unassigned        | Unassigned    | Fungus                              | Uncultured eukaryote clone GU941366<br>Uncultured fungus clone AB615542     | 363/434(84%)<br>192/200(96%) | South China Sea<br>Marine subsurface sediments in Japan |
| 107    | 3     | 32    | Unassigned      | Unassigned        | Unassigned    | Fungus                              | Uncultured fungus clone JX369635                                            | 288/379(76%)                 | Soil                                                    |
| 108    | 1     | 695   | Unassigned      | Unassigned        | Unassigned    | Fungus                              | Uncultured eukaryote clone GU941366<br>Uncultured fungus clone AB615542     | 367/440(83%)<br>189/197(96%) | South China Sea<br>Marine subsurface sediments in Japan |
| 109    | 3     | 9     | Chytridiomycota | Unassigned        | Unassigned    | Chytridiomycota                     | Uncultured Chytridiomycota clone HQ219419                                   | 333/431(77%)                 | Dimictic and eutrophic lake in France                   |
| 110    | 3     | 448   | Basidiomycota   | Russulales        | Unassigned    | Russulales                          | Russulales sp. AB846966                                                     | 136/158(86%)                 | Plant roots                                             |
| 111    | 5     | 48    | Unassigned      | Unassigned        | Unassigned    | Fungus                              | Uncultured fungus clone JX342287<br>Uncultured Chytridiaceae clone EU754999 | 296/389(76%)<br>179/212(84%) | Soil<br>Soil and roots of oilseed rape                  |
| 112    | 2     | 11    | Unassigned      | Unassigned        | Unassigned    | Fungus                              | Uncultured eukaryote clone KJ181484                                         | 174/179(97%)                 | South China Sea                                         |
| 113    | 2     | 4     | Unassigned      | Unassigned        | Unassigned    | Fungus                              | Uncultured fungus clone AB615542                                            | 174/179(97%)                 | Marine subsurface sediments in Japan                    |

\*species accepted (sequence identities  $\geq 97\%$ ); \*\*genus accepted (sequence identities between 95% and 97%).

**Table S2.** Distribution of the 113 OTUs found in the 8 sediment samples, including their number of reads.

| OTU ID | K1   | K2   | K3   | K4   | K5 | K6 | K7   | K8   |
|--------|------|------|------|------|----|----|------|------|
| 1      | 2469 | 2289 | 2854 | 2832 | 12 | 0  | 7    | 6583 |
| 2      | 0    | 0    | 0    | 0    | 0  | 24 | 0    | 0    |
| 3      | 0    | 0    | 0    | 0    | 0  | 3  | 0    | 0    |
| 4      | 1075 | 665  | 931  | 853  | 3  | 30 | 11   | 2127 |
| 5      | 0    | 0    | 0    | 0    | 1  | 5  | 1    | 0    |
| 6      | 0    | 0    | 0    | 0    | 0  | 5  | 0    | 0    |
| 7      | 0    | 0    | 0    | 0    | 0  | 0  | 0    | 2    |
| 8      | 6    | 6    | 20   | 16   | 0  | 1  | 0    | 31   |
| 9      | 0    | 3    | 0    | 0    | 0  | 0  | 0    | 0    |
| 10     | 6    | 10   | 3    | 0    | 19 | 32 | 21   | 4    |
| 11     | 0    | 0    | 0    | 0    | 3  | 0  | 15   | 0    |
| 12     | 0    | 0    | 0    | 0    | 0  | 2  | 0    | 0    |
| 13     | 0    | 0    | 0    | 0    | 3  | 0  | 0    | 0    |
| 14     | 2    | 2    | 15   | 14   | 0  | 0  | 0    | 6    |
| 15     | 0    | 0    | 0    | 0    | 0  | 25 | 12   | 0    |
| 16     | 0    | 0    | 0    | 0    | 0  | 3  | 0    | 0    |
| 17     | 0    | 0    | 0    | 0    | 0  | 6  | 0    | 0    |
| 18     | 0    | 0    | 0    | 0    | 0  | 16 | 0    | 0    |
| 19     | 0    | 0    | 0    | 0    | 0  | 8  | 0    | 0    |
| 20     | 0    | 0    | 0    | 3    | 0  | 0  | 0    | 0    |
| 21     | 0    | 0    | 1    | 0    | 0  | 0  | 0    | 6    |
| 22     | 0    | 1    | 0    | 0    | 0  | 9  | 0    | 0    |
| 23     | 0    | 0    | 0    | 0    | 4  | 7  | 0    | 2    |
| 24     | 0    | 0    | 0    | 0    | 0  | 2  | 0    | 4    |
| 25     | 0    | 1    | 0    | 4    | 3  | 9  | 0    | 0    |
| 26     | 3    | 2    | 0    | 1    | 3  | 0  | 0    | 0    |
| 27     | 0    | 0    | 0    | 0    | 1  | 11 | 0    | 0    |
| 28     | 0    | 0    | 0    | 0    | 0  | 5  | 0    | 0    |
| 29     | 36   | 34   | 6    | 0    | 3  | 1  | 132  | 5    |
| 30     | 0    | 0    | 0    | 0    | 2  | 0  | 0    | 0    |
| 31     | 0    | 0    | 0    | 0    | 1  | 2  | 0    | 3    |
| 32     | 0    | 0    | 0    | 0    | 0  | 61 | 0    | 0    |
| 33     | 0    | 0    | 0    | 0    | 0  | 21 | 0    | 0    |
| 34     | 121  | 165  | 19   | 3    | 1  | 11 | 2824 | 3    |
| 35     | 0    | 0    | 0    | 0    | 0  | 15 | 0    | 0    |
| 36     | 0    | 0    | 0    | 0    | 0  | 3  | 0    | 0    |
| 37     | 0    | 0    | 0    | 0    | 0  | 4  | 0    | 0    |
| 38     | 511  | 333  | 84   | 7    | 9  | 17 | 677  | 7    |
| 39     | 0    | 24   | 0    | 0    | 3  | 59 | 1696 | 28   |
| 40     | 0    | 0    | 0    | 0    | 0  | 64 | 0    | 0    |



| OTU ID | K1 | K2 | K3 | K4 | K5 | K6  | K7  | K8 |
|--------|----|----|----|----|----|-----|-----|----|
| 41     | 0  | 3  | 0  | 2  | 0  | 0   | 0   | 1  |
| 42     | 0  | 0  | 0  | 0  | 0  | 5   | 0   | 0  |
| 43     | 0  | 0  | 0  | 0  | 0  | 82  | 0   | 0  |
| 44     | 0  | 0  | 0  | 0  | 0  | 0   | 4   | 0  |
| 45     | 0  | 0  | 0  | 0  | 0  | 6   | 0   | 0  |
| 46     | 43 | 40 | 41 | 40 | 0  | 10  | 0   | 88 |
| 47     | 0  | 0  | 0  | 0  | 0  | 4   | 0   | 0  |
| 48     | 0  | 0  | 0  | 0  | 0  | 10  | 0   | 0  |
| 49     | 0  | 0  | 0  | 0  | 0  | 27  | 0   | 0  |
| 50     | 0  | 0  | 0  | 0  | 0  | 313 | 0   | 0  |
| 51     | 0  | 0  | 0  | 0  | 2  | 3   | 0   | 0  |
| 52     | 0  | 7  | 1  | 0  | 2  | 121 | 0   | 0  |
| 53     | 0  | 0  | 0  | 0  | 0  | 3   | 0   | 0  |
| 54     | 0  | 0  | 0  | 0  | 0  | 2   | 0   | 0  |
| 55     | 0  | 0  | 0  | 0  | 0  | 5   | 0   | 0  |
| 56     | 0  | 0  | 0  | 0  | 0  | 17  | 0   | 0  |
| 57     | 0  | 0  | 0  | 0  | 0  | 17  | 0   | 0  |
| 58     | 0  | 0  | 0  | 0  | 0  | 28  | 40  | 0  |
| 59     | 0  | 0  | 0  | 0  | 0  | 16  | 0   | 0  |
| 60     | 0  | 0  | 0  | 0  | 0  | 8   | 0   | 0  |
| 61     | 0  | 0  | 0  | 0  | 0  | 38  | 0   | 0  |
| 62     | 0  | 0  | 0  | 0  | 0  | 5   | 0   | 0  |
| 63     | 0  | 0  | 0  | 0  | 0  | 7   | 0   | 0  |
| 64     | 0  | 0  | 0  | 0  | 0  | 4   | 0   | 0  |
| 65     | 0  | 0  | 0  | 0  | 0  | 15  | 0   | 0  |
| 66     | 0  | 0  | 0  | 0  | 0  | 22  | 0   | 0  |
| 67     | 0  | 0  | 0  | 0  | 0  | 8   | 0   | 0  |
| 68     | 33 | 3  | 2  | 2  | 1  | 0   | 0   | 0  |
| 69     | 0  | 0  | 0  | 0  | 0  | 16  | 0   | 0  |
| 70     | 0  | 0  | 0  | 0  | 5  | 0   | 0   | 0  |
| 71     | 0  | 0  | 0  | 0  | 0  | 2   | 0   | 0  |
| 72     | 0  | 0  | 0  | 0  | 0  | 14  | 0   | 0  |
| 73     | 2  | 0  | 0  | 0  | 0  | 0   | 0   | 0  |
| 74     | 0  | 4  | 0  | 0  | 0  | 105 | 0   | 0  |
| 75     | 0  | 0  | 0  | 0  | 0  | 0   | 19  | 0  |
| 76     | 0  | 0  | 0  | 0  | 0  | 65  | 12  | 0  |
| 77     | 0  | 0  | 0  | 0  | 0  | 5   | 0   | 0  |
| 78     | 11 | 45 | 0  | 4  | 36 | 25  | 30  | 5  |
| 79     | 0  | 0  | 0  | 0  | 0  | 55  | 112 | 0  |
| 80     | 0  | 0  | 0  | 0  | 0  | 25  | 0   | 0  |
| 81     | 0  | 0  | 0  | 0  | 0  | 4   | 0   | 0  |
| 82     | 0  | 0  | 0  | 0  | 0  | 78  | 0   | 0  |
| 83     | 0  | 0  | 0  | 0  | 0  | 2   | 0   | 0  |

| OTU ID | K1  | K2  | K3  | K4  | K5   | K6  | K7   | K8   |
|--------|-----|-----|-----|-----|------|-----|------|------|
| 84     | 0   | 0   | 0   | 0   | 0    | 4   | 0    | 0    |
| 85     | 0   | 0   | 0   | 0   | 0    | 3   | 0    | 0    |
| 86     | 0   | 0   | 0   | 0   | 0    | 66  | 0    | 0    |
| 87     | 44  | 51  | 34  | 25  | 0    | 0   | 0    | 123  |
| 88     | 526 | 371 | 91  | 8   | 6    | 27  | 1970 | 6    |
| 89     | 0   | 0   | 0   | 0   | 0    | 4   | 0    | 0    |
| 90     | 0   | 0   | 0   | 0   | 0    | 31  | 0    | 0    |
| 91     | 0   | 0   | 0   | 0   | 5    | 0   | 0    | 0    |
| 92     | 0   | 0   | 0   | 0   | 0    | 33  | 0    | 0    |
| 93     | 17  | 23  | 12  | 16  | 0    | 0   | 0    | 70   |
| 94     | 0   | 0   | 0   | 0   | 0    | 26  | 0    | 0    |
| 95     | 610 | 405 | 631 | 566 | 4    | 1   | 5    | 1099 |
| 96     | 0   | 0   | 0   | 0   | 0    | 59  | 0    | 0    |
| 97     | 0   | 0   | 0   | 0   | 0    | 0   | 4    | 0    |
| 98     | 0   | 0   | 0   | 0   | 0    | 9   | 0    | 0    |
| 99     | 0   | 0   | 0   | 0   | 0    | 7   | 0    | 0    |
| 100    | 0   | 0   | 0   | 0   | 0    | 7   | 0    | 0    |
| 101    | 1   | 13  | 0   | 0   | 0    | 120 | 314  | 4    |
| 102    | 0   | 0   | 0   | 0   | 0    | 1   | 2    | 0    |
| 103    | 0   | 0   | 0   | 0   | 0    | 0   | 164  | 0    |
| 104    | 0   | 0   | 0   | 0   | 0    | 3   | 10   | 0    |
| 105    | 0   | 0   | 0   | 0   | 0    | 0   | 0    | 3    |
| 106    | 0   | 1   | 0   | 0   | 1356 | 0   | 0    | 0    |
| 107    | 0   | 1   | 0   | 0   | 0    | 6   | 25   | 0    |
| 108    | 0   | 0   | 0   | 0   | 695  | 0   | 0    | 0    |
| 109    | 3   | 1   | 0   | 0   | 5    | 0   | 0    | 0    |
| 110    | 0   | 0   | 1   | 0   | 6    | 440 | 0    | 1    |
| 111    | 7   | 1   | 0   | 1   | 32   | 0   | 0    | 7    |
| 112    | 0   | 0   | 0   | 0   | 2    | 9   | 0    | 0    |
| 113    | 1   | 3   | 0   | 0   | 0    | 0   | 0    | 0    |

**Table S3.** Dissimilarity test (multiple response permutation procedure, MRPP) for significant differences in fungal community composition among the 3 basins using QIIME 1.8.0 software.

|                       | group A | groupB | groupC | groupA vs.<br>groupB vs.<br>groupC | groupA vs.<br>groupB | groupA vs.<br>groupC | groupB vs.<br>groupC |
|-----------------------|---------|--------|--------|------------------------------------|----------------------|----------------------|----------------------|
| delta                 | 0.1324  | 0.2782 | 0.9557 | -                                  | -                    | -                    | -                    |
| n <sup>#</sup>        | 2       | 3      | 3      | -                                  | -                    | -                    | -                    |
| A-value               | -       | -      | -      | 0.3048                             | 0.1921               | 0.2658               | 0.2626               |
| Observed delta        | -       | -      | -      | 0.4958                             | 0.2199               | 0.6263               | 0.617                |
| Expected delta        | -       | -      | -      | 0.7132                             | 0.2722               | 0.8531               | 0.8367               |
| Significance of delta | -       | -      | -      | 0.005                              | 0.086                | 0.086                | 0.107                |

group A: K1, and K2

group B: K3, K4, and K8

group C: K5, K6, and K7

# Number of samples in each group

Based on 999 permutations

**Table S4.** Primers used for 454 pyrosequencing of the 8 sediment samples.

| Sample ID | Forward Primer (5'-adaptor A-barcode-ITS1F-3')                       | Reverse Primer (5'-adaptor B-ITS4-3')                   |
|-----------|----------------------------------------------------------------------|---------------------------------------------------------|
| K1        | CCATCTCATCCCTGCGTGTCTCCGACGACT- AGCAGATG<br>-CTTGGTCATTTAGAGGAAGTAA  | CCTATCCCCTGTGTGCCTTGGCAGTCGACT-TCCTCCGCTT<br>ATTGATATGC |
| K2        | CCATCTCATCCCTGCGTGTCTCCGACGACT - AGCTACGT<br>-CTTGGTCATTTAGAGGAAGTAA | CCTATCCCCTGTGTGCCTTGGCAGTCGACT-TCCTCCGCTT<br>ATTGATATGC |
| K3        | CCATCTCATCCCTGCGTGTCTCCGACGACT - AGACACAG<br>-CTTGGTCATTTAGAGGAAGTAA | CCTATCCCCTGTGTGCCTTGGCAGTCGACT-TCCTCCGCTT<br>ATTGATATGC |
| K4        | CCATCTCATCCCTGCGTGTCTCCGACGACT - ACTGCTCT<br>-CTTGGTCATTTAGAGGAAGTAA | CCTATCCCCTGTGTGCCTTGGCAGTCGACT-TCCTCCGCTT<br>ATTGATATGC |
| K5        | CCATCTCATCCCTGCGTGTCTCCGACGACT - AGCAGATG<br>-CTTGGTCATTTAGAGGAAGTAA | CCTATCCCCTGTGTGCCTTGGCAGTCGACT-TCCTCCGCTT<br>ATTGATATGC |
| K6        | CCATCTCATCCCTGCGTGTCTCCGACGACT - ACACACTG<br>-CTTGGTCATTTAGAGGAAGTAA | CCTATCCCCTGTGTGCCTTGGCAGTCGACT-TCCTCCGCTT<br>ATTGATATGC |
| K7        | CCATCTCATCCCTGCGTGTCTCCGACGACT - ACACGTCA<br>-CTTGGTCATTTAGAGGAAGTAA | CCTATCCCCTGTGTGCCTTGGCAGTCGACT-TCCTCCGCTT<br>ATTGATATGC |
| K8        | CCATCTCATCCCTGCGTGTCTCCGACGACT - AGTCGTCA<br>-CTTGGTCATTTAGAGGAAGTAA | CCTATCCCCTGTGTGCCTTGGCAGTCGACT-TCCTCCGCTT<br>ATTGATATGC |

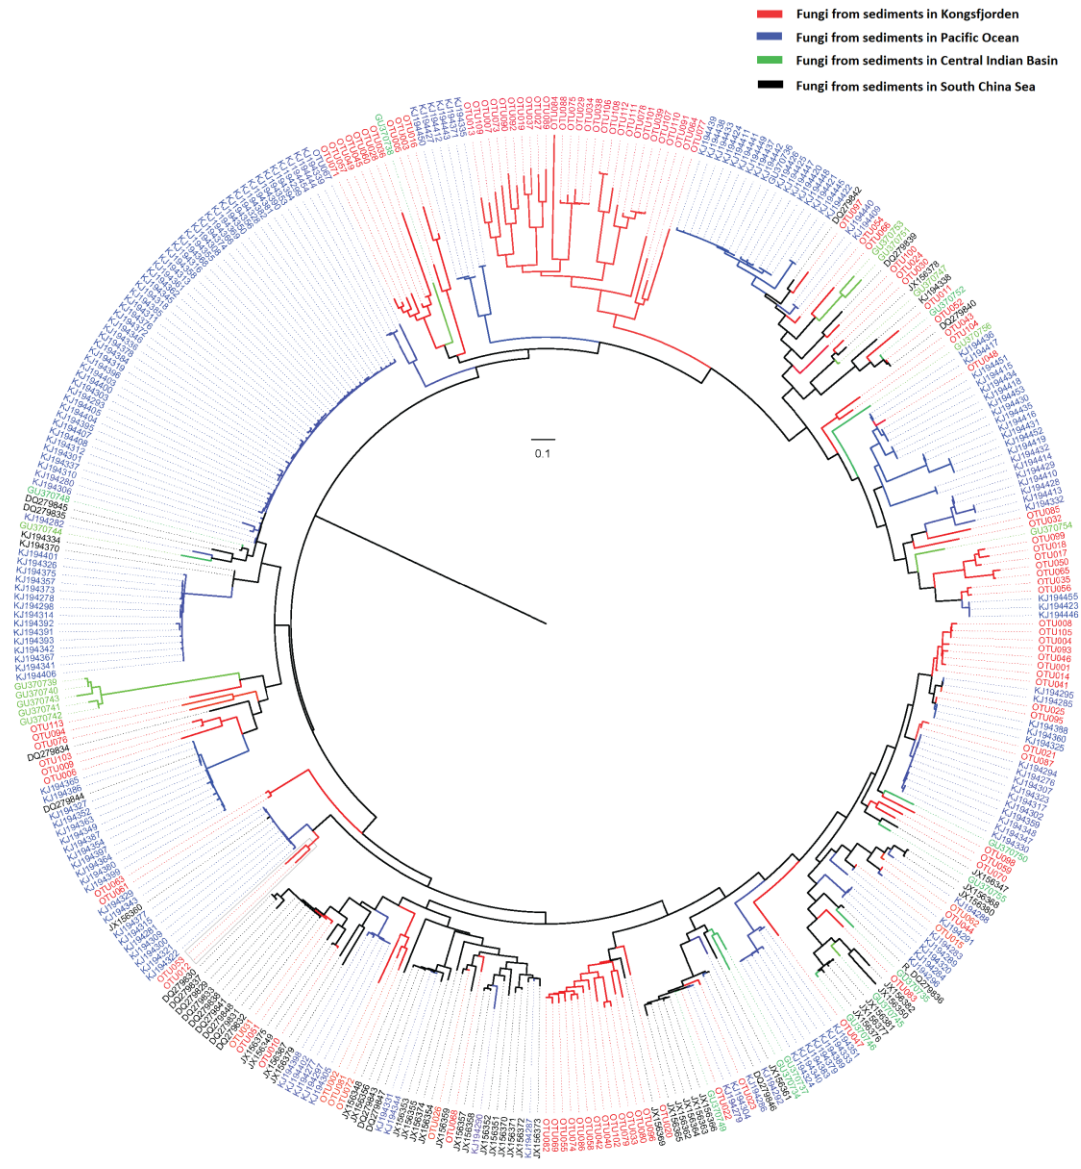

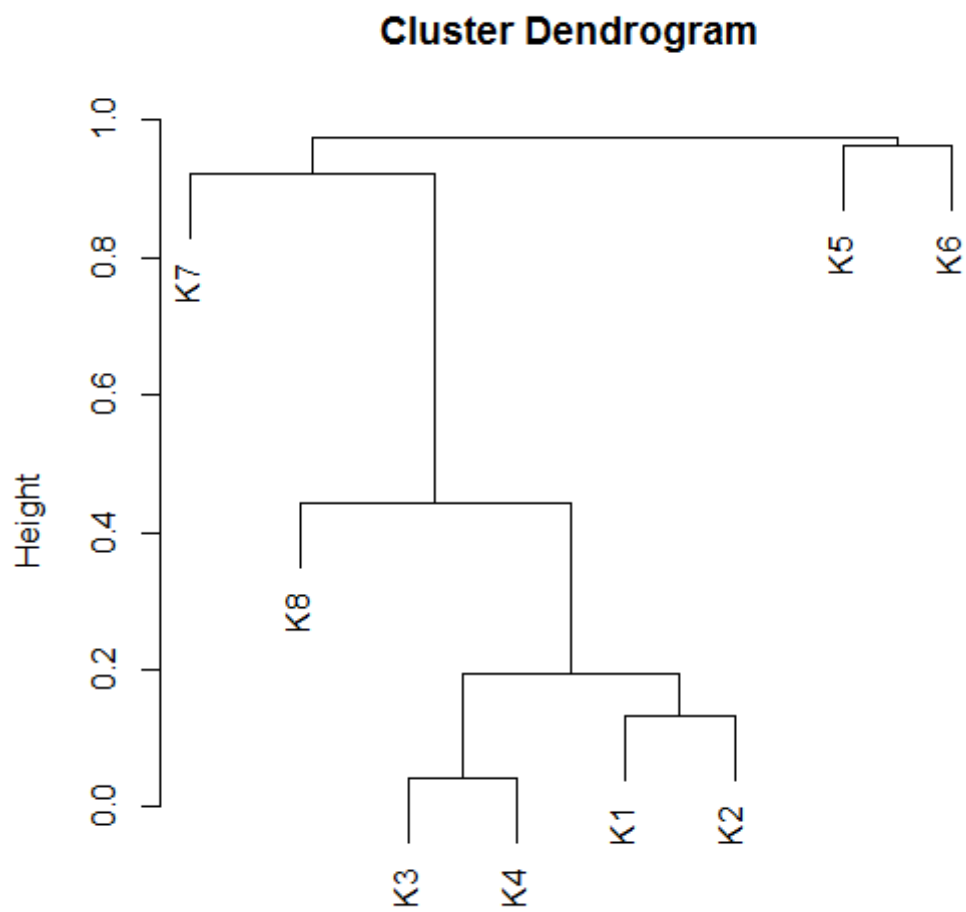

**Figure S2.** Hierarchical clustering analysis of fungal communities in the 8 sediment samples based Bray-Curis-transformed abundance data for OTUs using R 3.1.1 statistical software.
